# Supplementary material for: Mechanisms of coherent re-arrangement for long-lived spin order
Source: Copernicus journal article supplement (doi:10.5194/mr-2-741-2021), 2021-10-08
Supplement: Supplementary file 1 [file mr-2-741-2021-supplement.zip]

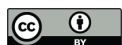

*Supplement of*

## **Mechanisms of coherent re-arrangement for long-lived spin order**

**Florin Teleanu and Paul R. Vasos**

*Correspondence to:* Paul R. Vasos ([paul.vasos@eli-np.ro](mailto:paul.vasos@eli-np.ro))

- [mr-2-741-2021-supplement-title-page.pdf](#)
- [M2S\\_SLIC\\_ZZZQx\\_comparison\\_weak\\_strong\\_coupling.nb](#)
- [Supplement.pdf](#)

The copyright of individual parts of the supplement might differ from the article licence.
