# Supplementary material for: Mechanisms of coherent re-arrangement for long-lived spin order
Source: Copernicus journal article supplement (doi:10.5194/mr-2-741-2021), 2021-10-08
Supplement: Supplementary file 2 [file mr-2-741-2021-supplement.zip]

## Table of Contents:

1. **Figure S1:** Experimental methods known so far for converting thermal equilibrium nuclear spin polarization into long-lived coherences
2. **Mathematica Notebooks:** link to the numerical simulations using SpinDynamica to compare the singlet polarization efficiency of M2S, SLIC and ZZ+ZQ<sub>x</sub> in different coupling regimes.

**1. Figure S1:** Experimental methods known so far for converting thermal equilibrium nuclear spin polarization into long-lived coherences

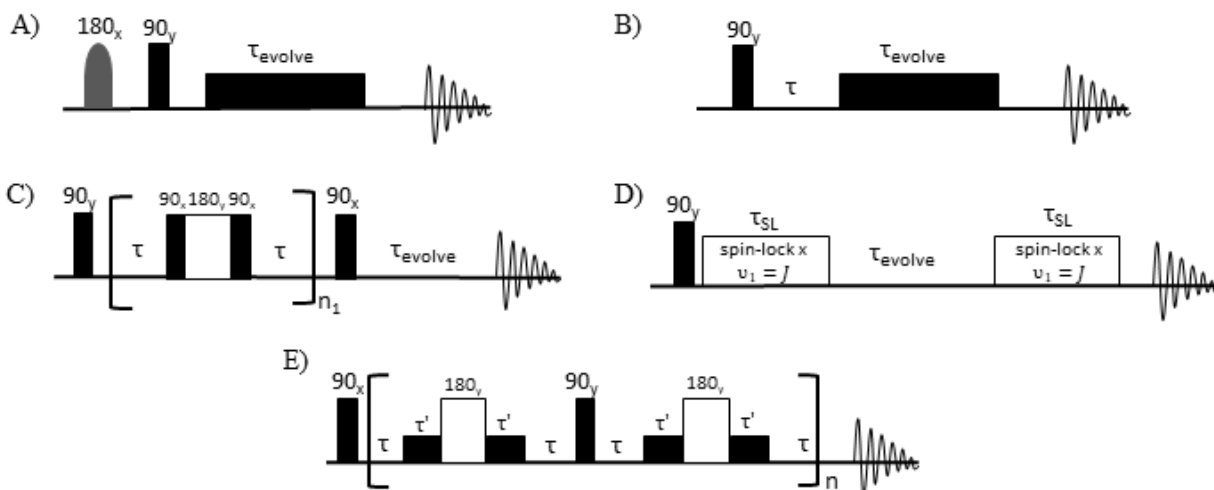

Figure S1. Experimental methods known so far for converting thermal equilibrium nuclear spin polarization into long-lived coherences. A) The first pulse sequence used to excite LLC, with a selective  $\pi$ -pulse followed by a non-selective  $\pi/2$ -pulse and spin-lock(Sarkar et al., 2010); B) a similar pulse sequence, but the relative orientation of spin angular momentum operators is given by an evolution period under the effect of different chemical shifts ( $\tau = 1/2\Delta\nu$ ); C) First half of the M2S pulse sequences, with trains of pulses whose repetition number  $n_1$  is optimized as a function of scalar coupling and chemical shift difference(Taylor & Levitt, 2011b); D) SLIC pulse sequence that also excite LLC during the spin-lock with amplitude equal to the scalar coupling between the two nuclei<sup>5</sup> (sequences C and D are particularly adapted for molecules with ‘quasi-equivalent’ spins, i.e., where differences in chemical shifts between the spins involved are less than the J-couplings between these spins); E) Improved LLC pulse sequence with a refocussing  $\pi/2$ -pulse train that allows for a better determination of the coherence’s lifetime ( $\tau = 1/2\Delta\nu$ ;  $\tau' = 1/4J$ ) (Singh & Kurur, 2015).

**2. Mathematica Notebooks:** link to the numerical simulations using SpinDynamica to compare the singlet polarization efficiency of M2S, SLIC and ZZ+ZQ<sub>x</sub> in different coupling regimes.

The Mathematica notebook can be accessed free of charge at the following link:

[DOI: 10.13140/RG.2.2.12614.40008](https://doi.org/10.13140/RG.2.2.12614.40008)
